1 **Subsoil arbuscular mycorrhizal fungal communities in arable soil differ from**  
2 **those in topsoil**

3 Moisés A. Sosa-Hernández<sup>1,2</sup>, Julien Roy<sup>1,2</sup>, Stefan Hempel<sup>1,2</sup>, Timo Kautz<sup>3</sup>, Ulrich  
4 Köpke<sup>3</sup>, Marie Uksa<sup>4,5</sup>, Michael Schloter<sup>5,6</sup>, Tancredi Caruso<sup>7</sup>, Matthias C. Rillig<sup>1,2\*</sup>.

5 <sup>1</sup> *Institute of Biology, Plant Ecology, Freie Universität Berlin, Berlin, Germany*

6 <sup>2</sup> *Berlin-Brandenburg Institute of Advanced Biodiversity Research, Berlin, Germany*

7 <sup>3</sup> *Institute of Organic Agriculture, University of Bonn, Bonn, Germany*

8 <sup>4</sup> *Institute of Soil Science and Land Evaluation, Soil Biology, University of Hohenheim,*  
9 *Stuttgart, Germany*

10 <sup>5</sup> *Research Unit for Comparative Microbiome Analysis, Helmholtz Zentrum München,*  
11 *Neuherberg, Germany*

12 <sup>6</sup> *Chair for Soil Science, Technische Universität München, Freising, Germany*

13 <sup>7</sup> *School of Biological Sciences and Institute for Global Food Security, Queen's*  
14 *University of Belfast, Belfast, Northern Ireland (UK)*

15

16

17 \* Correspondence to Moisés A. Sosa Hernández, Freie Universität Berlin, Plant Ecology,

18 Altensteinstr. 6, D-14195 Berlin, Germany; Email: [moisessh@zedat.fu-berlin.de](mailto:moisessh@zedat.fu-berlin.de) Tel.

19 +49 (0)30 838-53143

20

21 **Abstract**

22 **Arbuscular mycorrhizal fungi are recognized as important drivers of plant health**  
23 **and productivity in agriculture but very often existing knowledge is limited to the**  
24 **topsoil. With growing interest in the role of subsoil in sustainable agriculture, we**  
25 **used high-throughput Illumina sequencing on a set of samples encompassing**  
26 **drilosphere, rhizosphere and bulk soil, in both top- and subsoil. Our results**  
27 **show subsoil AMF communities harbor unique Operational Taxonomic Units**  
28 **(OTUs) and that both soil depths differ in community structure both at the OTU**  
29 **and family level. Our results emphasize the distinctness of subsoil AMF**  
30 **communities and the potential role of subsoil as a biodiversity reservoir.**

31 **Keywords:** subsoil; drilosphere; arbuscular mycorrhiza; agriculture; Illumina MiSeq;

32 soil depth

33

34 Arbuscular mycorrhizal fungi (AMF) belong to the monophyletic subphylum  
35 Glomeromycotina (Spatafora et al., 2016) and form a symbiotic relationship with the  
36 roots of most land plants including the majority of agricultural crops (Smith and Read,  
37 2008). This symbiosis is of great relevance for sustainable agriculture due to its ability  
38 to increase productivity (Lekberg and Koide, 2005), nutrient uptake (Smith and Smith,  
39 2011), soil aggregation (Leifheit et al., 2014), and plant protection (Veresoglou and  
40 Rillig, 2012). In arable fields, the subsoil (i.e. the soil beneath the plough layer)  
41 contains more than two thirds of the soil nutrient pool (Kautz et al., 2013). Thus,  
42 understanding how AMF communities vary with depth and what factors drive their  
43 community assembly is a prerequisite for developing appropriate subsoil management  
44 strategies.

45 Previous studies have shown that AMF spore abundance and diversity in agricultural  
46 fields decrease with soil depth (Muleta et al., 2008; Oehl et al., 2005; Yang et al.,  
47 2010), however under some circumstances subsoil spore diversity may be greater than  
48 in the topsoil (Oehl et al., 2005). Moreover, some species' spores seem to be  
49 associated with particular soil layers, suggesting a vertical variation in community  
50 composition (Muleta et al., 2008; Oehl et al., 2005; Yang et al., 2010). These spore-  
51 based results have recently been supported by small ribosomal subunit (SSU) cloning-  
52 sequencing approaches, finding differences in community composition between AMF  
53 communities at different depths (Moll et al., 2016). Nonetheless, we are just starting to  
54 unearth subsoil AMF diversity, and the community assembly processes remain  
55 unknown.

56 To shed light on subsoil AMF communities, we used Illumina MiSeq sequencing to  
57 analyze a set of soil samples encompassing drilosphere (soil directly influenced by  
58 earthworms), rhizosphere (soil directly influenced by roots) and bulk soil (without roots  
59 or earthworm burrows), in both top- (10-30 cm, i. e. above the ploughing layer) and  
60 subsoil (60-75 cm). Sampling the different compartments was intended to add greater  
61 resolution to our results. The first 10 cm were not sampled due to difficulties in  
62 differentiating the mentioned compartments at this depth. Samples were collected in  
63 May 2011 in a field planted with *Cichorium intybus* L. (see Uksa et al. (2014) for  
64 details).

65 We performed amplicon-based AMF specific metabarcoding using the AMF specific  
66 primer sets described in Krüger et al. (2009) and the primers LR3 and LR2rev  
67 (Hofstetter et al., 2002). The final product of amplification is a 350-440 bp region in the  
68 LSU including the variable D1-D2 region. Samples were paired-end sequenced on an  
69 Illumina MiSeq platform. Bioinformatics details are given in the supplementary material.  
70 Briefly, following quality filtering and chimera removal, sequences were *de novo*

71 clustered at a 97% similarity level into operational taxonomic units (OTUs).  
72 Representative sequences of these OTUs have been deposited at ENA under  
73 accession numbers LT855246-LT855309.

74 Taxonomic assignment of the OTUs was carried out using BLAST+ (Camacho et al.,  
75 2009) against Glomeromycotina (i.e. AMF) reference sequences published in Krüger et  
76 al. (2009) and against the EMBL nucleotide database (Kanz et al., 2005). Following a  
77 similar approach as in Martínez-García et al. (2015) for SSU sequences, we  
78 considered matches with  $\geq 97\%$  similarity a species level match,  $\geq 90\%$  a genus level  
79 match,  $\geq 80\%$  a family level match and  $\geq 70\%$  a subphylum level match. A species level  
80 match refers to how confidently we assign a name to our OTU based on known  
81 sequences, and does not imply that these OTUs are to be considered equivalent to  
82 those species. In total, 64 OTUs were confidently assigned to the subphylum  
83 Glomeromycotina. Of these, we were able to assign 11 OTUs at the species level, 34  
84 at the genus level, 16 at the family level and 3 at the subphylum level.

85 The resulting OTU table was analyzed with R version 3.3.1 (R Core Team, 2016).  
86 Relative abundance data were obtained by rarefaction of all the samples to the lowest  
87 number of reads in a sample (34377 reads), by random subsampling without  
88 replacement. Details on the analyses are given in the supplementary material.

89 Our results present high-throughput molecular evidence that the subsoil AMF  
90 community is not simply a subset of the topsoil community, but harbors unique OTUs  
91 and that the two soil depths differ in structure both at the family level (**Fig. 1**) and at the  
92 OTU level (**Fig. 2**). We detected 64 Glomeromycotina OTUs belonging to 7 families  
93 (Ambisporaceae, Archaeosporaceae, Claroideoglomeraceae, Diversisporaceae,  
94 Gigasporaceae, Glomeraceae and Paraglomeraceae, **Table S1**). OTU accumulation  
95 curves for both top- and subsoil reached a plateau, indicating that we captured the  
96 majority of the diversity (**Fig. S2**). We observed a highly significant community shift

97 when comparing the top- and the subsoil (PERMANOVA,  $F_{1,16} = 8.67$ ,  $P < 0.001$ , **Fig. 3**).

98 Most remarkably, Claroideoglomeraceae and Diversisporaceae exhibit inversely

99 proportional relative abundances across the studied soil profiles (**Fig. 1**). In topsoil

100 OTUs assigned to Diversisporaceae represented 41.8% of the reads whereas in

101 subsoil they represented 7.3% (GLM,  $F_{1,15} = 50.83$   $P < 0.001$ ). Conversely, OTUs

102 assigned to Claroideoglomeraceae represented 15.0% of the reads in topsoil but

103 59.9% in subsoil (GLM,  $F_{1,15} = 17.87$   $P < 0.001$ ). The greater relative abundance of the

104 family Claroideoglomeraceae in subsoil is not correlated with its nominal diversity but

105 with a modest increase in relative richness (**Fig. S3a,b**). This finding may point to some

106 species in the Claroideoglomeraceae family being subsoil specialists and particularly

107 dominant in this compartment. This hypothesis is supported by previous results where

108 *Claroideoglossum etunicatum* spores were more commonly found in deeper soil layers

109 (Oehl et al., 2005; Yang et al., 2010). Conversely, both nominal and relative diversity in

110 the Diversisporaceae decreased in subsoil showing no evidence for specialization in

111 subsoil within this family. The family Glomeraceae however, is detected at a mostly

112 constant relative abundance across topsoil (34.1%) and subsoil (28.4%), but decreases

113 in abundance from rhizosphere (49.0%) to bulk soil and drilosphere considered

114 together (23.6%; GLM,  $F_{1,15} = 6.79$   $P = 0.02$ ) (**Fig. 1**). Members of the Glomeraceae are

115 known to preferentially allocate biomass inside the root while producing limited

116 biomass in the soil (Powell et al., 2009). Our observations broadly support the idea

117 that, due to producing a limited extraradical mycelium, Glomeraceae species are

118 expected to preferentially colonize the direct surroundings of the root and to rapidly

119 decrease in abundance outside the rhizosphere. We hypothesize that species with a

120 preferentially intraradical lifestyle are less responsive to abiotic factors outside the root

121 and therefore can readily colonize different soil horizons. In turn, those intraradical

122 lifestyles would be mostly affected by host characteristics.

123 In our subsoil samples OTU richness ( $27.4 \pm 5.9$ ) was significantly lower than in topsoil  
124 ( $41.6 \pm 6.0$ ; GLM,  $F_{1,15}=23.83$   $P<0.001$ ). Nonetheless we detected a total of 49 OTUs in  
125 subsoil, with two OTUs (OTU\_40 subphylum Glomeromycotina and OTU\_68 genus  
126 *Glomus*) exclusively found in the subsoil, also before normalization (data not shown).  
127 Agricultural soils are subjected to a set of disturbances including fertilization or plant  
128 removal during harvest; topsoils are additionally subjected to high disturbance in form  
129 of tillage, negatively influencing AMF diversity (Kabir, 2005). Applying the C-S-R  
130 (competitor, stress tolerator, ruderal) framework to AMF (Chagnon *et al.*, 2013), we  
131 would expect topsoil to be dominated by more ruderal species (i.e. elevated growth  
132 rates, rapid and abundant spore production, etc.) and subsoil by stress tolerators (i.e.  
133 low growth rates, long lived mycelium, etc.). We believe this may be one of the major  
134 factors explaining the observed differences in the communities across depth.

135 In our study no compartment effect was detected for the communities (PERMANOVA,  
136  $F_{2,16}= 0.68$ ,  $P=0.66$ ), besides the mentioned change in relative abundance of the family  
137 Glomeraceae (see above). However, previous studies conducted with the same  
138 samples show that bacterial communities exhibit a clear compartmentation in the  
139 subsoil (Uksa *et al.*, 2015). This difference might be related to the linear, hyphal growth  
140 habit of fungi and their unique ability to integrate over larger soil volumes.

141 We were able to show that subsoil communities are clearly different and not only a  
142 subset of topsoil communities, and found contrasting patterns of abundance for  
143 different families. Whether this shift in community composition also means a shift in  
144 function remains unknown; but the clear difference in dominant families with depth  
145 suggests turnover also in functional traits (Powell *et al.* 2009). Our results emphasize  
146 the need to account for subsoil when designing agricultural management strategies  
147 and highlight the potential role of deeper soil layers as a biodiversity reservoir.

148

149

## 150 **Acknowledgements**

151 MR acknowledges funding through the Federal Ministry of Education and Research  
152 (BMBF) initiative 'BonaRes - Soil as a sustainable resource for the bioeconomy' for the  
153 project Soil<sup>3</sup>. TC was supported by the project SENSE (Structure and Ecological Niche  
154 in the Soil Environment; EC FP7 - 631399 - SENSE). Illumina sequencing was carried  
155 out at the Berlin Center for Genomics in Biodiversity Research (BeGenDiv, Berlin,  
156 Germany). All authors thank Doreen Fischer and Marta Fogt for their involvement in the  
157 sampling and sample preparation processes, respectively. MS-H thanks Margarita  
158 Moreno Bayón for constant support.

159

160

## 161 **References**

- 162 Camacho, C., Coulouris, G., Avagyan, V., Ma, N., Papadopoulos, J., Bealer, K.,  
163 Madden, T.L., 2009. BLAST+: architecture and applications. *BMC Bioinformatics*  
164 10, 421. doi:10.1186/1471-2105-10-421
- 165 Chagnon, P.L., Bradley, R.L., Maherali, H., Klironomos, J.N. 2013. A trait-based  
166 framework to understand life history of mycorrhizal fungi. *Trends in Plant Science*  
167 18: 484–491.
- 168 Hofstetter, V., Clémenton, H., Vilgalys, R., Moncalvo, J.-M., 2002. Phylogenetic  
169 analyses of the Lyophylleae (Agaricales, Basidiomycota) based on nuclear and  
170 mitochondrial rDNA sequences. *Mycological Research* 106, 1043–1059.  
171 doi:10.1017/S095375620200641X

- 172 Kabir, Z. 2005. Tillage or no-tillage: impacts on mycorrhizae. Canadian Journal of Plant  
173 Science 85: 23–29.
- 174 Kanz, C., Aldebert, P., Althorpe, N., Baker, W., Baldwin, A., Bates, K., Browne, P., van  
175 den Broek, A., Castro, M., Cochrane, G., Duggan, K., Eberhardt, R., Faruque, N.,  
176 Gamble, J., Diez, F.G., Harte, N., Kulikova, T., Lin, Q., Lombard, V., Lopez, R.,  
177 Mancuso, R., McHale, M., Nardone, F., Silventoinen, V., Sobhany, S., Stoehr, P.,  
178 Tuli, M.A., Tzouvara, K., Vaughan, R., Wu, D., Zhu, W., Apweiler, R., 2005. The  
179 EMBL Nucleotide Sequence Database. Nucleic Acids Research 33, D29-33.  
180 doi:10.1093/nar/gki098
- 181 Kautz, T., Amelung, W., Ewert, F., Gaiser, T., Horn, R., Jahn, R., Javaux, M., Kemna,  
182 A., Kuzyakov, Y., Munch, J.C., P??tzold, S., Peth, S., Scherer, H.W., Schloter, M.,  
183 Schneider, H., Vanderborght, J., Vetterlein, D., Walter, A., Wiesenberg, G.L.B.,  
184 Köpke, U., 2013. Nutrient acquisition from arable subsoils in temperate climates: A  
185 review. Soil Biology and Biochemistry 57, 1003–1022.  
186 doi:10.1016/j.soilbio.2012.09.014
- 187 Krüger, M., Stockinger, H., Krüger, C., Schüssler, A., 2009. DNA-based species level  
188 detection of *Glomeromycota*: one PCR primer set for all arbuscular mycorrhizal  
189 fungi. New Phytologist 183, 212–23. doi:10.1111/j.1469-8137.2009.02835.x
- 190 Leifheit, E.F., Veresoglou, S.D., Lehmann, A., Morris, E.K., Rillig, M.C., 2014. Multiple  
191 factors influence the role of arbuscular mycorrhizal fungi in soil aggregation-a  
192 meta-analysis. Plant and Soil 374, 523–537. doi:10.1007/s11104-013-1899-2
- 193 Lekberg, Y., Koide, R.T., 2005. Is plant performance limited by abundance of  
194 arbuscular mycorrhizal fungi? A meta-analysis of studies published between 1988  
195 and 2003. New Phytologist 168, 189–204. doi:10.1111/j.1469-8137.2005.01490.x
- 196 Martínez-García, L.B., Richardson, S.J., Tylianakis, J.M., Peltzer, D.A., Dickie, I.A.,



- 197 2015. Host identity is a dominant driver of mycorrhizal fungal community  
198 composition during ecosystem development. *New Phytologist* 205, 1565–1576.  
199 doi:10.1111/nph.13226
- 200 Moll, J., Hoppe, B., König, S., Wubet, T., Buscot, F., Krüger, D., 2016. Spatial  
201 Distribution of Fungal Communities in an Arable Soil. *PLoS ONE* 11, 1–17.  
202 doi:10.1371/journal.pone.0148130
- 203 Muleta, D., Assefa, F., Nemomissa, S., Granhall, U., 2008. Distribution of arbuscular  
204 mycorrhizal fungi spores in soils of smallholder agroforestry and monocultural  
205 coffee systems in southwestern Ethiopia. *Biology and Fertility of Soils* 44, 653–  
206 659. doi:10.1007/s00374-007-0261-3
- 207 Oehl, F., Sieverding, E., Ineichen, K., Ris, E.A., Boller, T., Wiemken, A., 2005.  
208 Community structure of arbuscular mycorrhizal fungi at different soil depths in  
209 extensively and intensively managed agroecosystems. *New Phytologist* 165, 273–  
210 283. doi:10.1111/j.1469-8137.2004.01235.x
- 211 Powell, J.R., Parrent, J.L., Hart, M.M., Klironomos, J.N., Rillig, M.C., Maherali, H.,  
212 2009. Phylogenetic trait conservatism and the evolution of functional trade-offs in  
213 arbuscular mycorrhizal fungi. *Proceedings of the Royal Society B: Biological*  
214 *Sciences* 276, 4237–45. doi:10.1098/rspb.2009.1015
- 215 R Core Team, 2016. R: A language and environment for statistical computing. R  
216 Foundation for Statistical Computing, Vienna, Austria.
- 217 Smith S. E., Read D., 2008. *Mycorrhizal Symbiosis*, 3rd Edn. San Diego, CA:  
218 Academic Press.
- 219 Smith, S.E., Smith, F.A., 2011. Roles of Arbuscular Mycorrhizas in Plant Nutrition and  
220 Growth: New Paradigms from Cellular to Ecosystem Scales. *Annual Review of*

- 221 Plant Biology 62, 227–250. doi:10.1146/annurev-arplant-042110-103846
- 222 Spatafora, J.W., Chang, Y., Benny, G.L., Lazarus, K., Smith, M.E., Berbee, M.L.,  
223 Bonito, G., Corradi, N., Grigoriev, I., Gryganskyi, A., James, T.Y., O'Donnell, K.,  
224 Roberson, R.W., Taylor, T.N., Uehling, J., Vilgalys, R., White, M.M., Stajich, J.E.,  
225 2016. A phylum-level phylogenetic classification of zygomycete fungi based on  
226 genome-scale data. *Mycologia* 108, 1028–1046. doi:10.3852/16-042
- 227 Uksa, M., Fischer, D., Welzl, G., Kautz, T., Köpke, U., Schloter, M., 2014. Community  
228 structure of prokaryotes and their functional potential in subsoils is more affected  
229 by spatial heterogeneity than by temporal variations. *Soil Biology and*  
230 *Biochemistry* 75, 197–201. doi:10.1016/j.soilbio.2014.04.018
- 231 Uksa, M., Schloter, M., Endesfelder, D., Kublik, S., Engel, M., Kautz, T., Köpke, U.,  
232 Fischer, D., 2015. Prokaryotes in subsoil-evidence for a strong spatial separation  
233 of different phyla by analysing co-occurrence networks. *Frontiers in Microbiology*  
234 6, 1–13. doi:10.3389/fmicb.2015.01269
- 235 Veresoglou, S.D., Rillig, M.C., 2012. Suppression of fungal and nematode plant  
236 pathogens through arbuscular mycorrhizal fungi. *Biology Letters* 8, 214–217.  
237 doi:10.1098/rsbl.2011.0874
- 238 Yang, F.Y., Li, G.Z., Zhang, D.E., Christie, P., Li, X.L., Gai, J.P., 2010. Geographical  
239 and plant genotype effects on the formation of arbuscular mycorrhiza in *Avena*  
240 *sativa* and *Avena nuda* at different soil depths. *Biology and Fertility of Soils* 46,  
241 435–443. doi:10.1007/s00374-010-0450-3
- 242
- 243

## 244 Figures

### 245 Fig. 1 Relative abundance of reads per family in different soil compartments.

246 Proportion of reads assigned to each family for depth (panel A), compartment (B) and  
247 depth and compartment (C). Families are coded by color. The category “Others”  
248 comprises the families Ambisporaceae, Archaeosporaceae, Gigasporaceae and  
249 Paraglomeraceae, as well as OTUs assigned only at the subphylum level. Topsoil =  
250 10-30 cm, subsoil = 60-75 cm. Extended results are presented in the supplementary  
251 materia

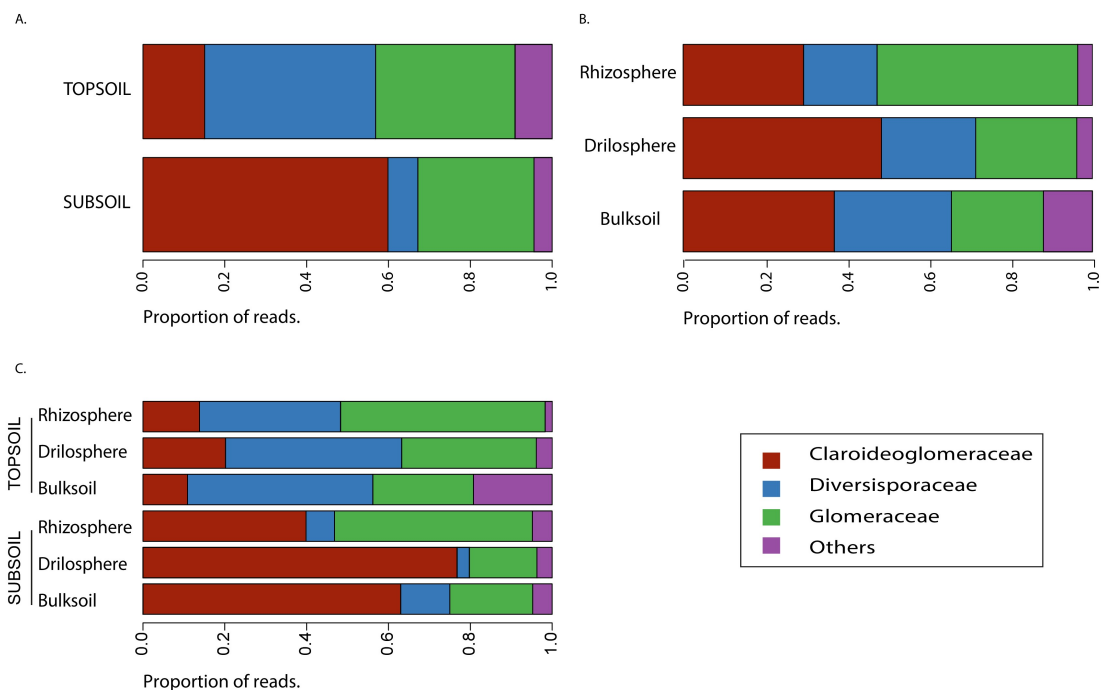

252

### 253 Fig. 2 Relative abundance of the 10 most abundant OTUs for each soil

254 compartment. Relative abundance of the OTU is represented by the area of the  
255 square (see scale below figure panel). The OTU list corresponds to the 10 most  
256 abundant OTUs for each environment. Topsoil = 10-30 cm, subsoil = 60-75 cm.  
257 Taxonomic assignment of each OTU is given (also see Table

258 S1).

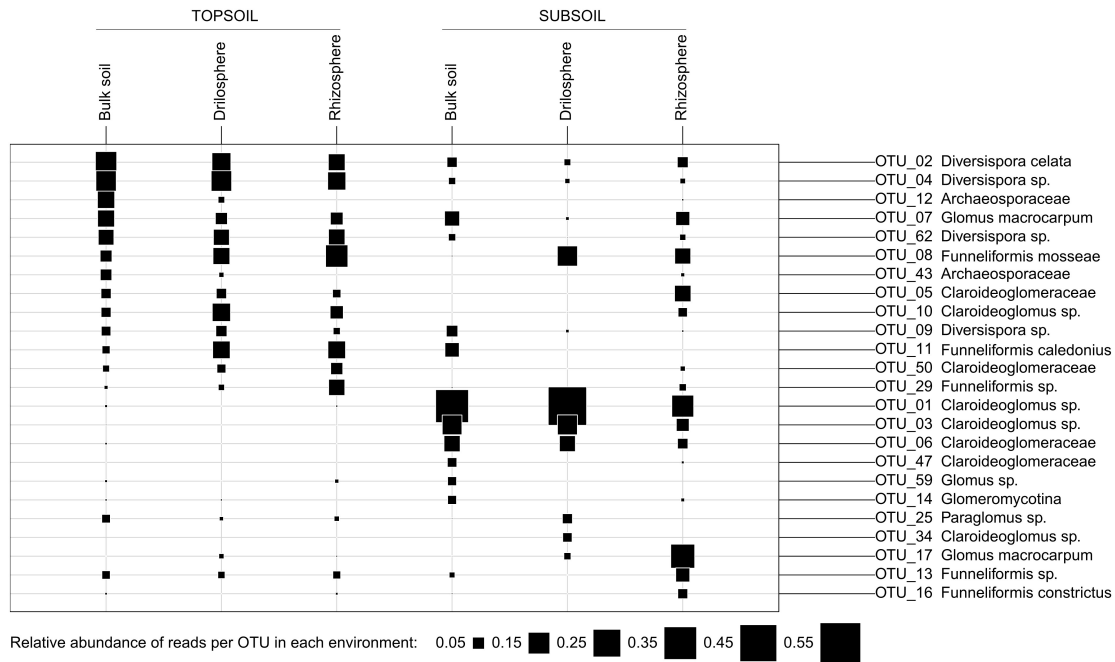

259

260

261 **Fig. 3 Community ordination of AMF in different soil compartments.** Non-metric  
 262 multidimensional scaling (NMDS) of Bray-Curtis pairwise community dissimilarities.  
 263 The OTU table was normalized to the minimum amount of reads per sample. Ellipses  
 264 represent one standard deviation around the centroid of each soil depth. Lines link  
 265 each sample to the centroid of the group. Topsoil = 10-30 cm, subsoil = 60-75 cm.  
 266 Depth is coded by color and compartment by symbol shape.

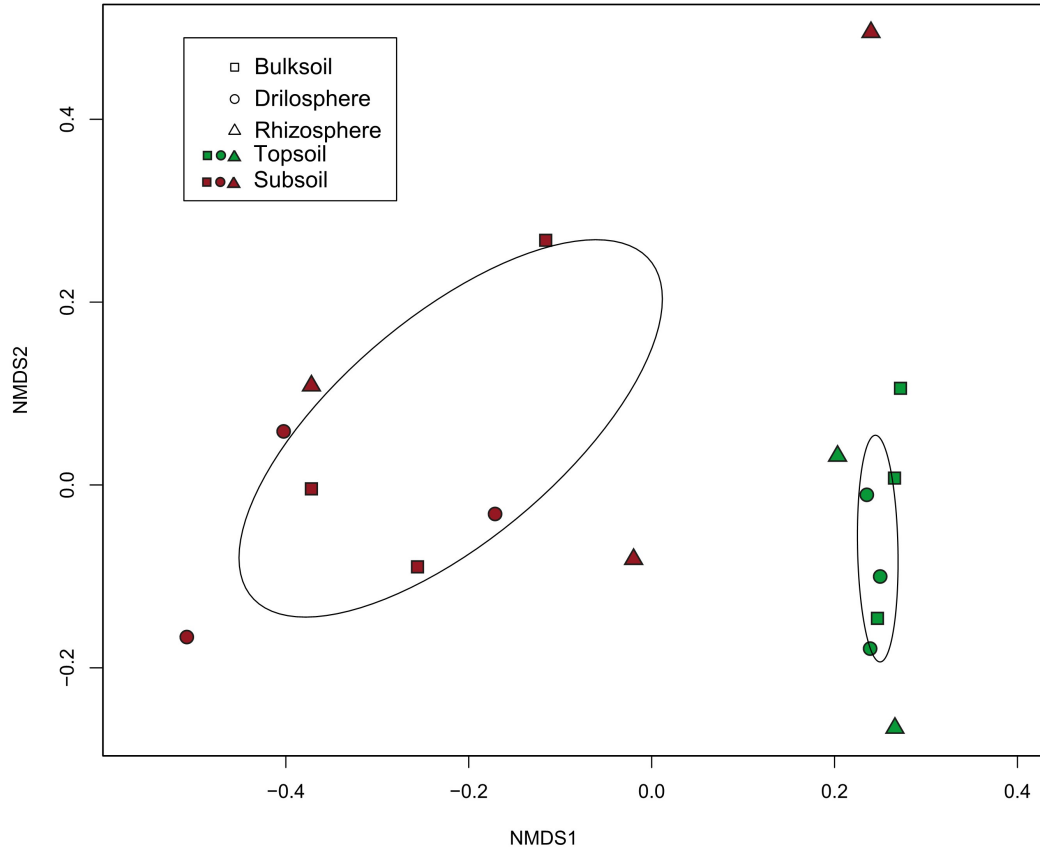

267

268
